# Supplementary figures and images for: Optical guiding-based cell focusing for Raman flow cell cytometer
Source: Royal Society of Chemistry journal article supplement (doi:10.1039/c8an00037a), 2018-01-01

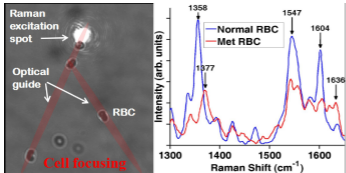

Supplement: c8an00037a1.pdf [file c8an00037a1.pdf]

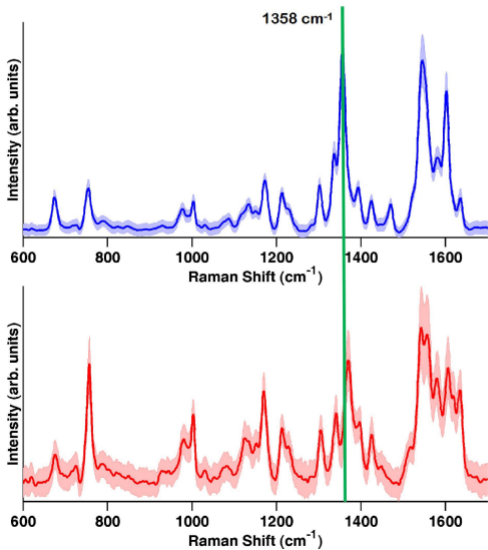

Supplement: c8an00037a10.pdf [file c8an00037a10.pdf]

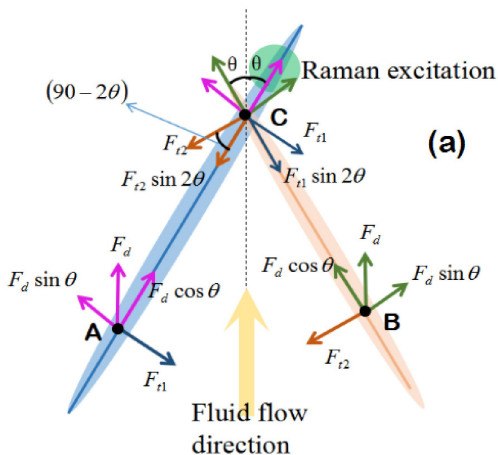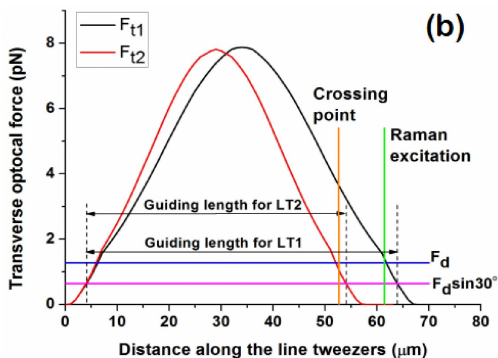

Supplement: c8an00037a3.pdf [file c8an00037a3.pdf]

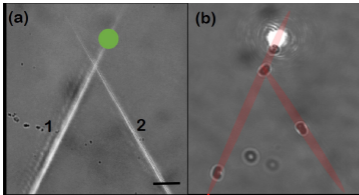

Supplement: c8an00037a8.pdf [file c8an00037a8.pdf]

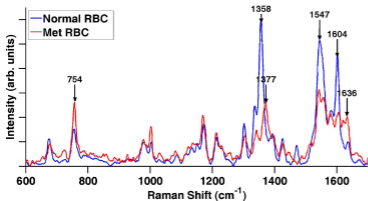

Supplement: c8an00037a9.pdf [file c8an00037a9.pdf]
